# Supplementary material
Source: PubMed Central journal article supplement (PMC6030470)
Supplement: NIHMS968660-supplement-1.pdf [file NIHMS968660-supplement-1.pdf]

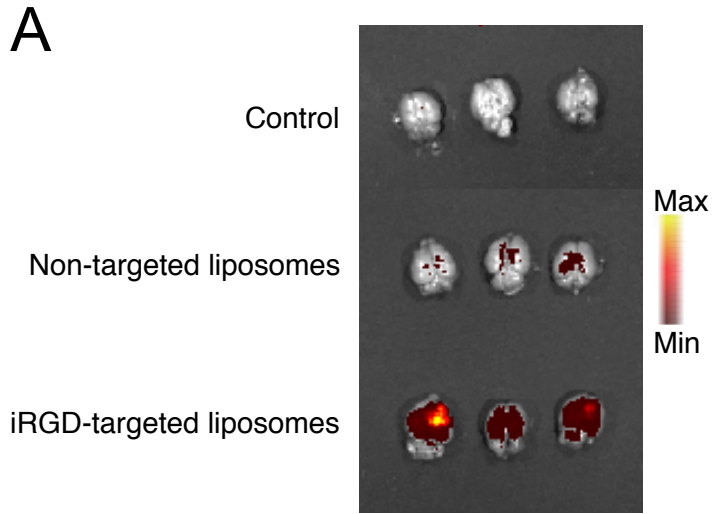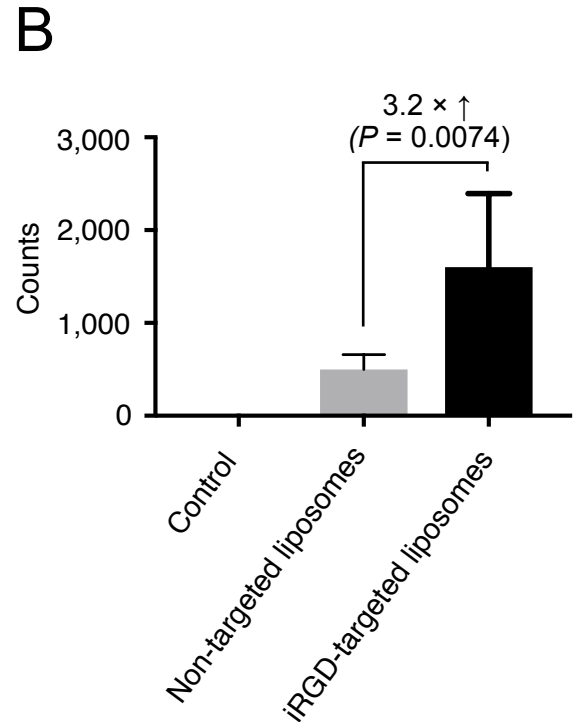

**Supplementary Fig. S1: Coupling iRGD peptide to the surface of systemically infused liposomes improves tumor homing.** PDGFB-driven gliomas were induced in genetically engineered mice (Tg(NES-TVA);Cdkn2a (Ink4a-Arf)<sup>-/-</sup>;Pten<sup>fl/fl</sup>; LSL). On day 14 after tumor initiation, animals were infused with fluorescent DiD-labeled liposomes, which were functionalized with iRGD peptide or not. Control animals received PBS. **(A)** Quantification of fluorescent signal in the brain isolated from euthanized mice six hours after liposome infusion. **(B)** Graph displaying average counts  $\pm$  S.E.M. Pairwise differences between groups were analyzed with the Wilcoxon rank-sum test.
