# Supplementary material
Source: PubMed Central journal article supplement (PMC6030470)
Supplement: NIHMS968660-supplement-2.pdf [file NIHMS968660-supplement-2.pdf]

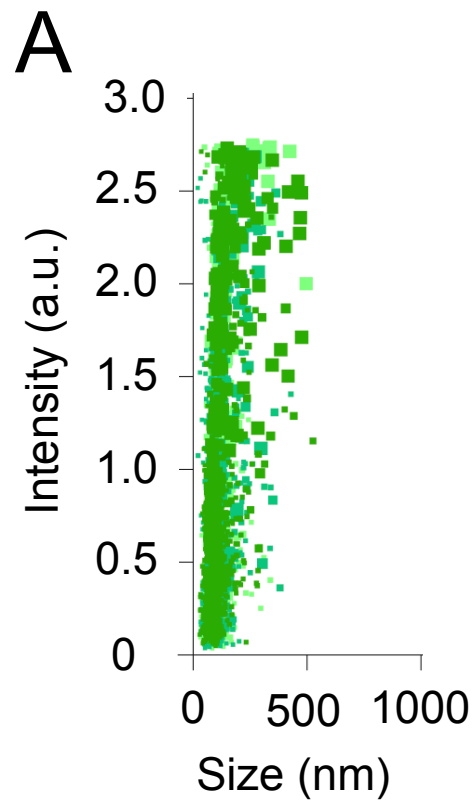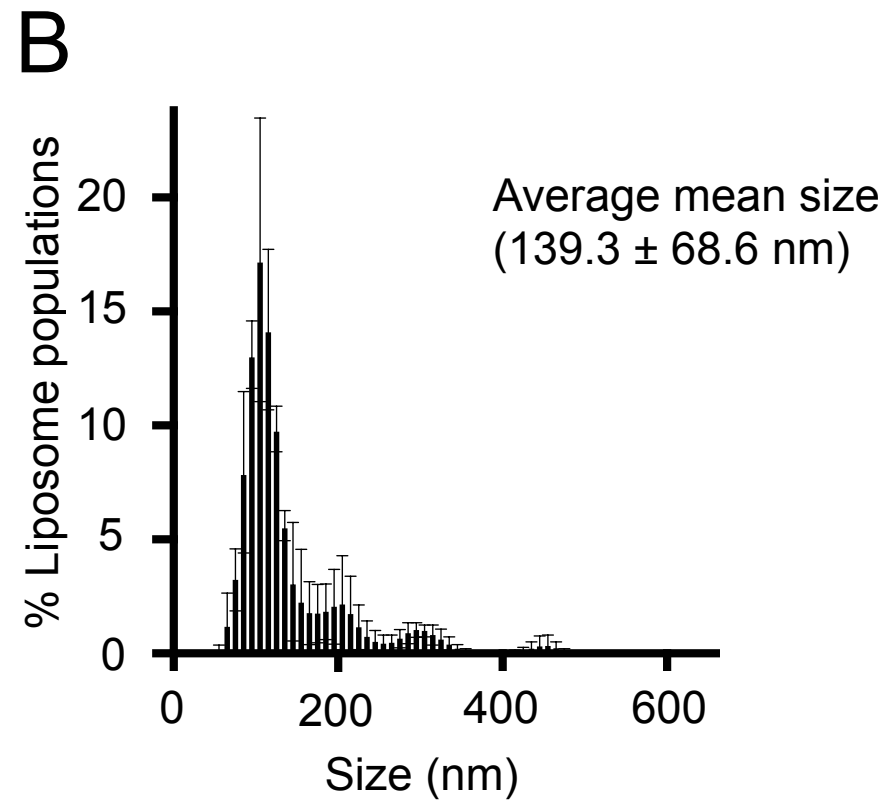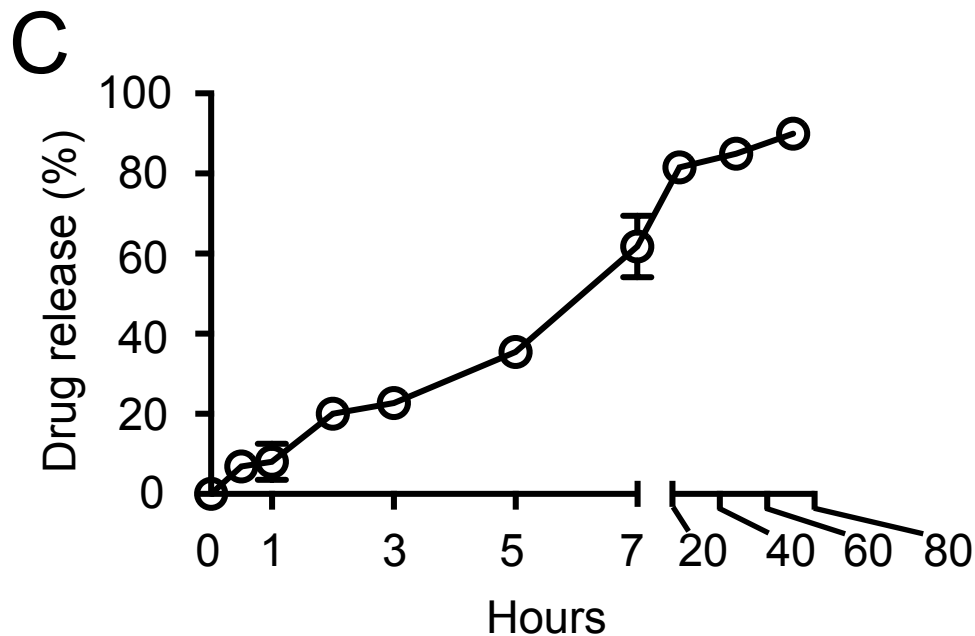

**Supplementary Fig. S2: Characterization of drug-loaded nanocarriers.** (A, B) Size distribution of liposomes carrying PI-3065 and 7DW8-5. (C) *In vitro* release kinetics of PI-3065 from liposomes. Liposomes were placed in a dialysis device (3.5K molecular weight cut-off) then immersed in water at 37 C for 70 hours. 200 l of dialyzed material was removed at predetermined time points and treated with 1% Triton X-100. PI-3065 concentration was measured by HPLC.
